# Supplementary material for: Facile synthesis and size-dependent optical properties of luminescent ZnIn2S4 nanocrystals derived from metal xanthates
Source: Royal Society of Chemistry journal article supplement (doi:10.1039/d2nj05175c), 2022-11-17
Supplement: d2nj05175c1.pdf [file d2nj05175c1.pdf]

## Facile Synthesis of Size-dependent Optical properties of Luminescent $\text{ZnIn}_2\text{S}_4$ nanocrystals derived from Metal Xanthates

Nisha Kushwah,<sup>a\*</sup> G. Kedarnath,<sup>a,b\*</sup> V. Sudarsan<sup>a</sup> and A. P. Srivastava<sup>c</sup>

**Fig S1.** TG curve of  $[\text{Zn}(\text{S}_2\text{COPr}^i)_2]$  (1) and  $[\text{In}(\text{S}_2\text{COPr}^i)_3]$  (2)

**Fig S2.** EDS spectrum of  $\text{ZnIn}_2\text{S}_4$  nanocrystals isolated at 10 minutes.

**Fig S3.** EDS spectrum of  $\text{ZnIn}_2\text{S}_4$  nanocrystals isolated at 15 minutes.

**Fig S4.** EDS spectrum of  $\text{ZnIn}_2\text{S}_4$  nanocrystals isolated at 20 minutes.

**Fig S5.** 2D elemental mapping of the constituent elements of  $\text{ZnIn}_2\text{S}_4$  nanocrystals.

**Fig S6.** Representative IR spectrum of  $\text{ZnIn}_2\text{S}_4$  nanocrystals.

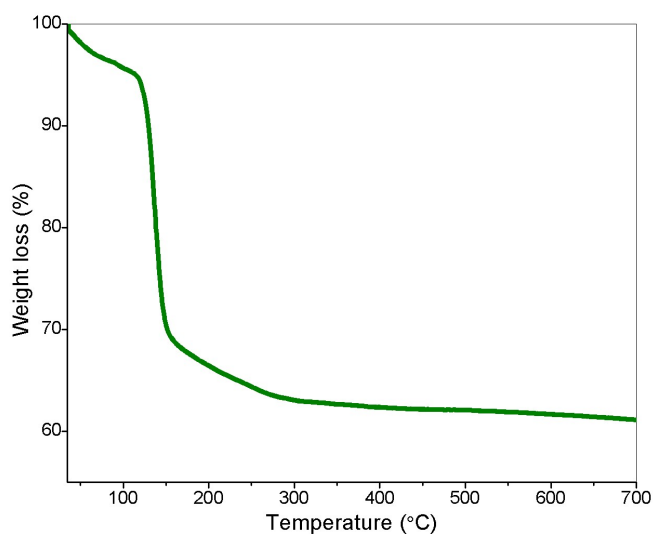

**Fig S1.** TG curve of  $[\text{Zn}(\text{S}_2\text{COPr}^i)_2]$  (1) and  $[\text{In}(\text{S}_2\text{COPr}^i)_3]$  (2).

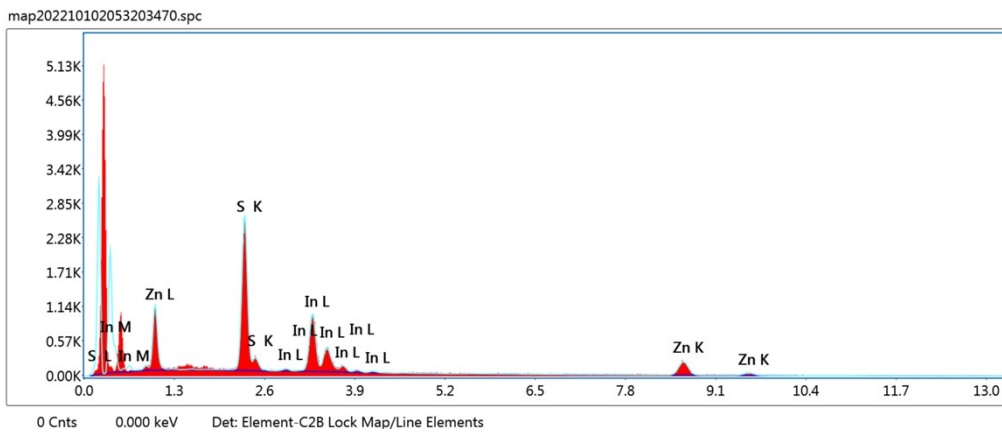

**Fig S2.** EDS spectrum of  $\text{ZnIn}_2\text{S}_4$  nanocrystals isolated at 10 minutes.

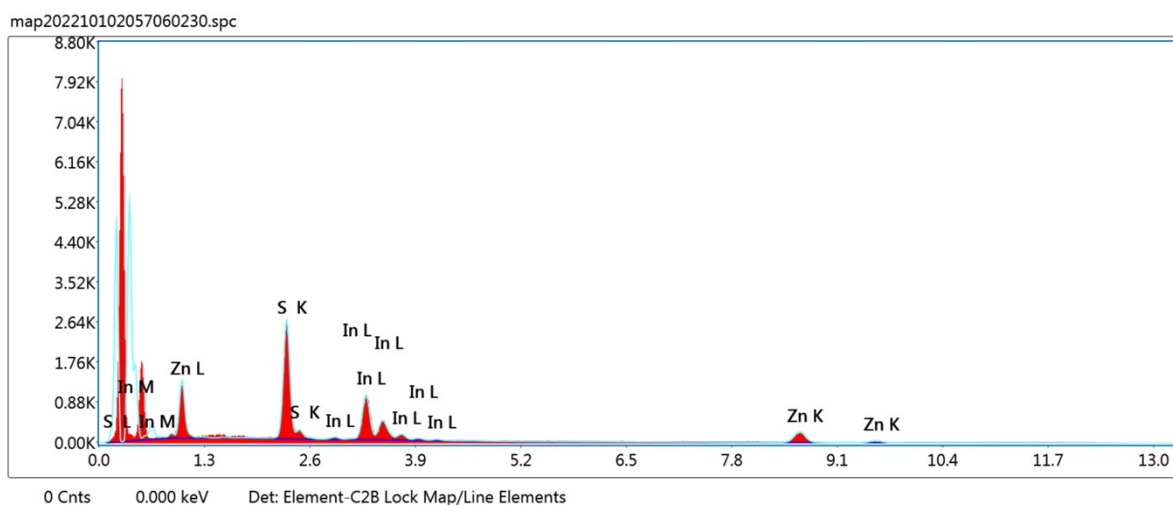

**Fig S3.** EDS spectrum of  $\text{ZnIn}_2\text{S}_4$  nanocrystals isolated at 15 minutes.

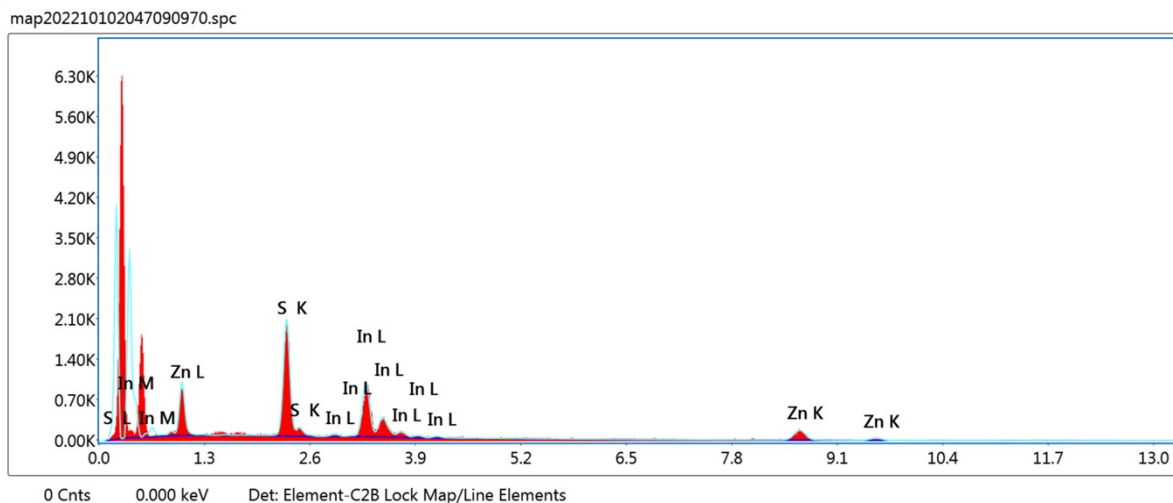

**Fig S4.** EDS spectrum of  $\text{ZnIn}_2\text{S}_4$  nanocrystals isolated at 20 minutes.

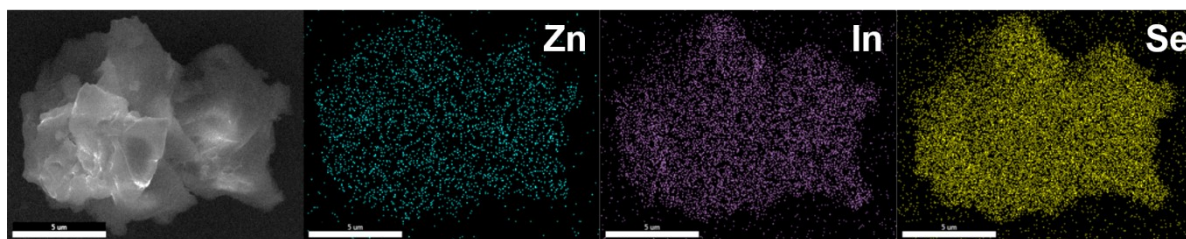

**Fig S5.** 2D elemental mapping of the constituent elements of ZnIn<sub>2</sub>S<sub>4</sub> nanocrystals.

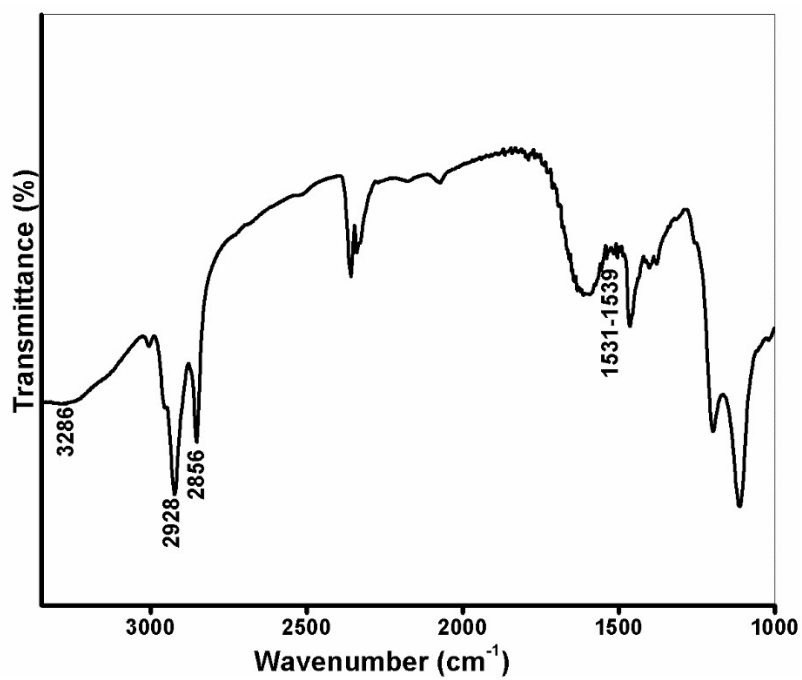

**Fig S6.** Representative IR spectrum of ZnIn<sub>2</sub>S<sub>4</sub> nanocrystals.
